# Supplementary material for: Novel Non-Centrosymmetric NdSr4O(BO3)3 Borate and Nd(Ca1−xSrx)4O(BO3)3 Solid Solutions: Preparation, Crystal Structures, Thermal Expansion and Optical Properties
Source: MDPI journal article supplement (doi:10.3390/cryst13091395), 2023-09-19
Supplement: s1 [file s1]

## Supplementary Materials

# Novel non-centrosymmetric $\text{NdSr}_4\text{O}(\text{BO}_3)_3$ borate and $\text{Nd}(\text{Ca}_{1-x}\text{Sr}_x)_4\text{O}(\text{BO}_3)_3$ solid solutions: preparation, crystal structures, thermal expansion and optical properties

Rimma Bubnova<sup>1,\*</sup>, Valentina Yukhno<sup>1</sup>, Artem Yurev<sup>1,2</sup>, Alexey Povolotskii<sup>2</sup>, Maria Krzhizhanovskaya<sup>2</sup>, Sergey Volkov<sup>1,3</sup>, Valery Ugolkov<sup>1</sup>, Stanislav Filatov<sup>2,\*</sup>

<sup>1</sup> Grebenshchikov Institute of Silicate Chemistry, Makarov Emb. 2, St. Petersburg, 199034, Russia

<sup>2</sup> Saint Petersburg State University, University Emb. 7/9, St. Petersburg, Russia

<sup>3</sup> Laboratory of Arctic Mineralogy and Material Sciences, Kola Science Centre, Russian Academy of Sciences, Apatity, 184209, Russia

\* Correspondence: filatov.stanislav@gmail.com, rimma\_bubnova@mail.ru

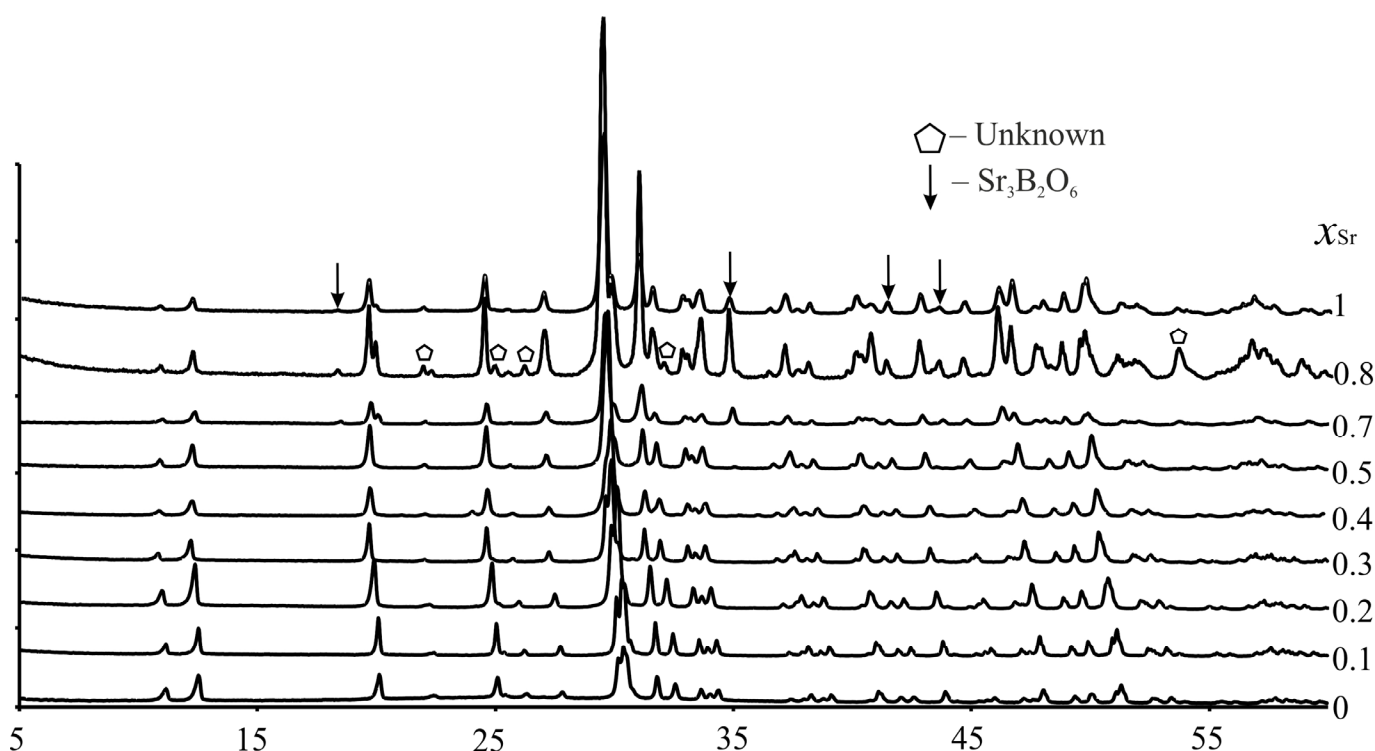

Figure S1. XRD patterns of the  $\text{Nd}(\text{Ca}_{1-x}\text{Sr}_x)_4\text{O}(\text{BO}_3)_3$  solid solutions synthesized at 1300 °C.

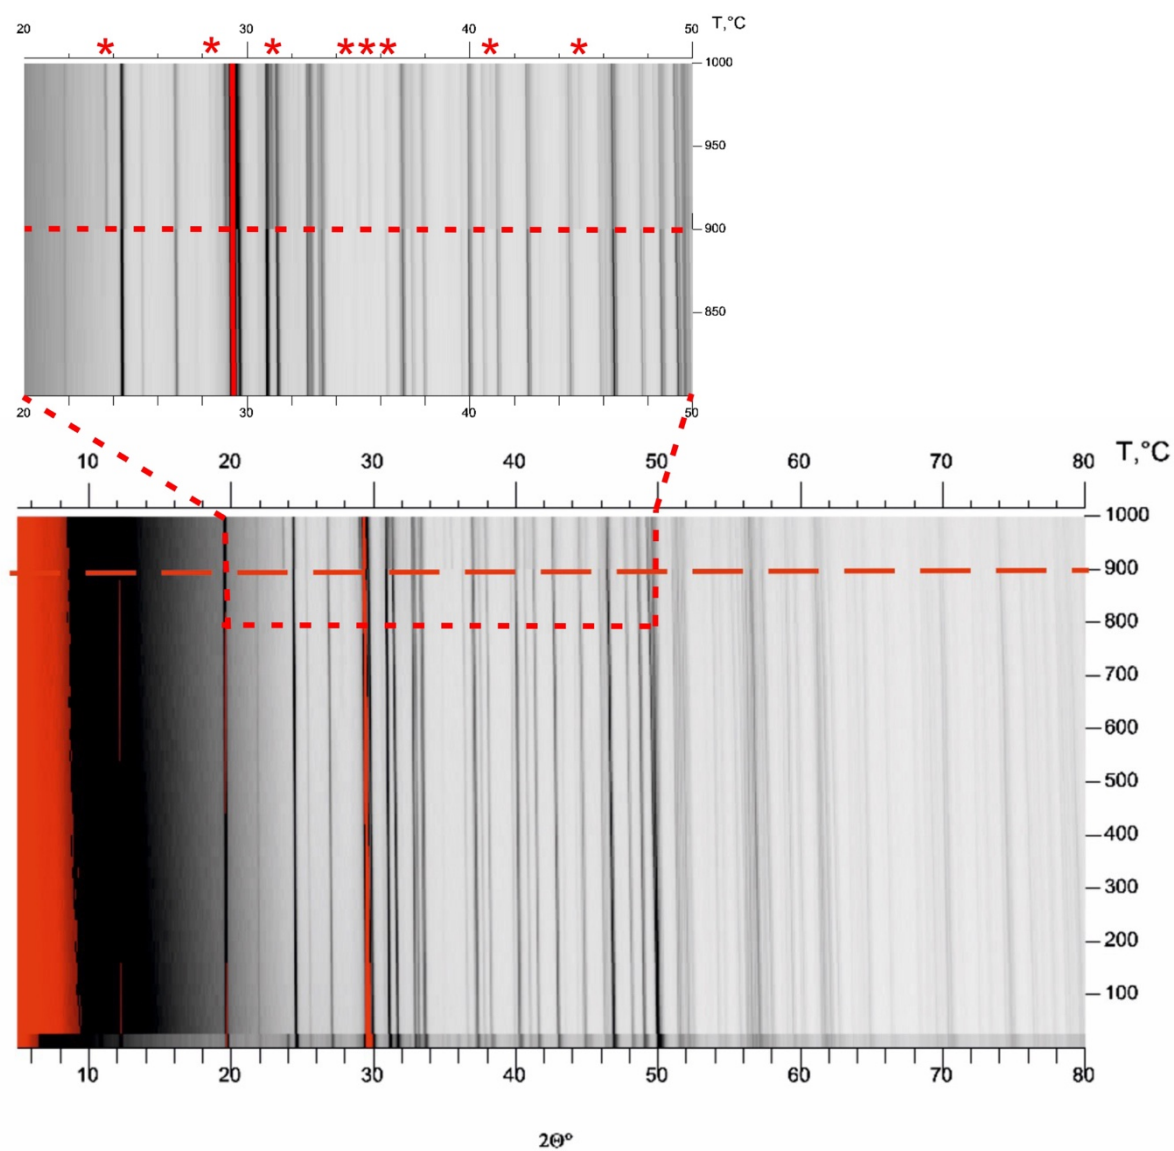

**Figure S2.** 2D-top view of HTXRD pattern of the sample  $(\text{Ca}_{0.5}\text{Sr}_{0.5})_4\text{NdO}(\text{BO}_3)_3$ . The dotted line indicates the beginning of the appearance of the impurity.

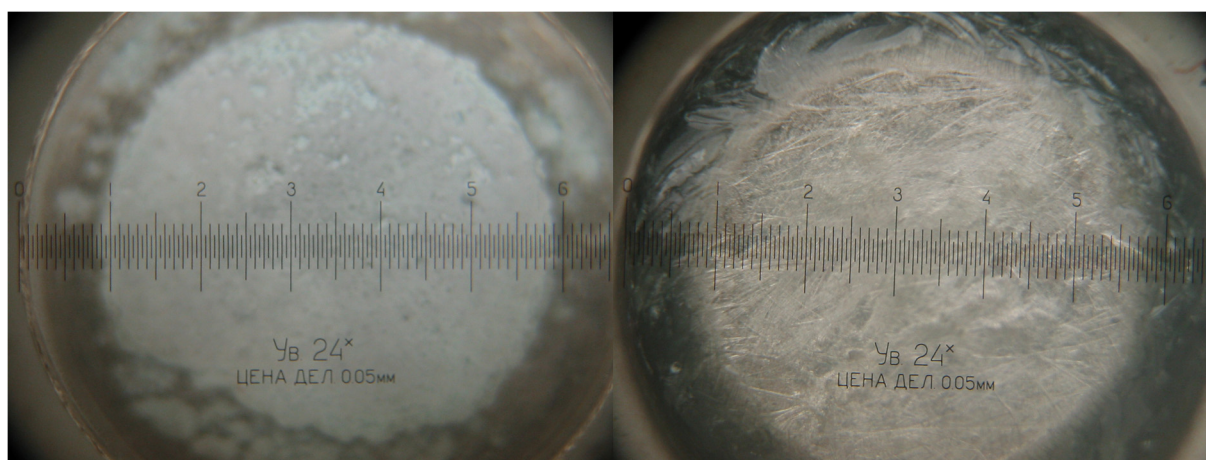

**Figure S3.** Microphotographs of the tablet in the crucible of  $\text{Ca}_4\text{NdO}(\text{BO}_3)_3$  before (left) and after (right) heating to 1445 °C.

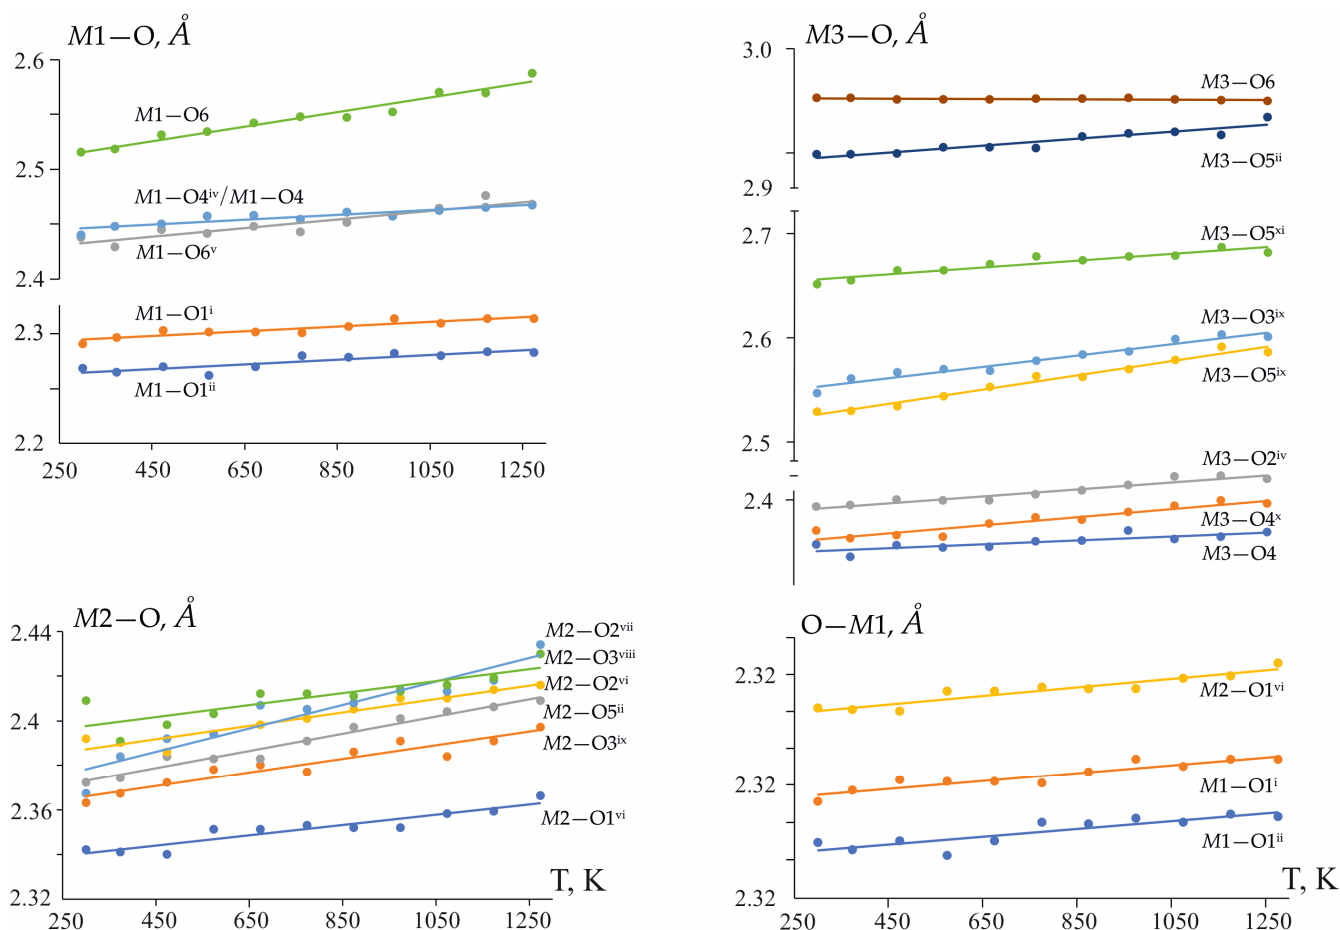

**Figure S4.** Changes of bond lengths in the cationic M1–M3 polyhedra and oxy-centered OM<sub>4</sub> tetrahedra (top left) with increasing temperature.

**Table S1.** Atomic coordinates, isotropic or equivalent isotropic displacement parameters ( $\text{\AA}^2$ ) in the structure of Nd(Ca<sub>0.8</sub>Sr<sub>0.2</sub>)<sub>4</sub>O(BO<sub>3</sub>)<sub>3</sub>.

|     | x           | y           | z             | $U_{\text{iso}}^*/U_{\text{eq}}$ | Occ. (<1) |
|-----|-------------|-------------|---------------|----------------------------------|-----------|
| Nd1 | 0.00152 (5) | 0           | -0.00766 (11) | 0.00779 (10)                     | 0,8977    |
| Ca1 | 0.00152 (5) | 0           | -0.00766 (11) | 0.00779 (10)                     | 0,1023    |
| Ca2 | 0.14550 (9) | 0.38750 (5) | 0.3236 (2)    | 0.0076 (2)                       | 0,8096    |
| Sr2 | 0.14550 (9) | 0.38750 (5) | 0.3236 (2)    | 0.0076 (2)                       | 0,1904    |
| Nd3 | 0.26439 (5) | 0.18051 (5) | 0.64796 (12)  | 0.0103 (2)                       | 0,0511    |
| Ca3 | 0.26439 (5) | 0.18051 (5) | 0.64796 (12)  | 0.0103 (2)                       | 0,7393    |
| Sr3 | 0.26439 (5) | 0.18051 (5) | 0.64796 (12)  | 0.0103 (2)                       | 0,2096    |
| O1  | 0.8274 (7)  | 0           | 0.4132 (16)   | 0.0082 (14)                      |           |
| O2  | 0.4694 (5)  | -0.0734 (2) | 0.7454 (11)   | 0.0145 (11)                      |           |
| O3  | 0.7984 (5)  | 0.1713 (3)  | 0.8861 (11)   | 0.0148 (11)                      |           |
| O4  | 0.0906 (5)  | 0.1443 (3)  | 0.0729 (11)   | 0.0151 (12)                      |           |
| O5  | 0.9708 (5)  | 0.2688 (2)  | 0.2640 (11)   | 0.0152 (11)                      |           |
| O6  | 0.2115 (7)  | 0           | 0.6034 (17)   | 0.0164 (18)                      |           |
| B1  | 0.3823 (10) | 0           | 0.697 (2)     | 0.0067 (19)                      |           |
| B2  | 0.9542 (7)  | 0.1944 (4)  | 0.0752 (16)   | 0.0080 (14)                      |           |

**Table S2.** Atomic coordinates, isotropic or equivalent isotropic displacement parameters ( $\text{\AA}^2$ ) and in the structure of  $\text{Nd}(\text{Ca}_{0.5}\text{Sr}_{0.5})_4\text{O}(\text{BO}_3)_3$ .

|     | x            | y           | z             | $U_{\text{iso}}^*/U_{\text{eq}}$ | Occ. (<1) |
|-----|--------------|-------------|---------------|----------------------------------|-----------|
| Nd1 | 0.00318 (7)  | 0           | -0.00499 (16) | 0.0087 (2)                       | 0,8728    |
| Ca1 | 0.00318 (7)  | 0           | -0.00499 (16) | 0.0087 (2)                       | 0,1272    |
| Ca2 | 0.14595 (13) | 0.38808 (7) | 0.3241 (3)    | 0.0098 (3)                       | 0,5303    |
| Sr2 | 0.14595 (13) | 0.38808 (7) | 0.3241 (3)    | 0.0098 (3)                       | 0,4697    |
| Nd3 | 0.26230 (7)  | 0.18051 (6) | 0.64482 (16)  | 0.0126 (3)                       | 0,0636    |
| Ca3 | 0.26230 (7)  | 0.18051 (6) | 0.64482 (16)  | 0.0126 (3)                       | 0,4061    |
| Sr3 | 0.26230 (7)  | 0.18051 (6) | 0.64482 (16)  | 0.0126 (3)                       | 0,5303    |
| O1  | 0.8305 (11)  | 0           | 0.418 (3)     | 0.010 (3)                        |           |
| O2  | 0.4678 (8)   | -0.0726 (4) | 0.7450 (18)   | 0.020 (2)                        |           |
| O3  | 0.7961 (8)   | 0.1714 (4)  | 0.8896 (19)   | 0.019 (2)                        |           |
| O4  | 0.0839 (9)   | 0.1427 (4)  | 0.073 (2)     | 0.019 (2)                        |           |
| O5  | 0.9710 (8)   | 0.2671 (4)  | 0.2662 (18)   | 0.015 (2)                        |           |
| O6  | 0.2116 (12)  | 0           | 0.610 (3)     | 0.019 (3)                        |           |
| B1  | 0.3814 (17)  | 0           | 0.702 (4)     | 0.007 (2)*                       |           |
| B2  | 0.9485 (12)  | 0.1938 (6)  | 0.075 (3)     | 0.009 (3)                        |           |

**Table S3.** Atomic coordinates, isotropic or equivalent isotropic displacement parameters ( $\text{\AA}^2$ ) and in the structure of  $\text{NdSr}_4\text{O}(\text{BO}_3)_3$ .

|     | x           | y           | z            | $U_{\text{iso}}^*/U_{\text{eq}}$ |
|-----|-------------|-------------|--------------|----------------------------------|
| Nd1 | 0.00485 (2) | 0           | -0.00412 (5) | 0.00537 (7)                      |
| Sr2 | 0.14605 (5) | 0.38837 (3) | 0.32515 (11) | 0.01550 (11)                     |
| Sr3 | 0.26167 (4) | 0.18132 (3) | 0.64490 (10) | 0.01194 (10)                     |
| O1  | 0.8350 (6)  | 0           | 0.4160 (12)  | 0.0064 (10)                      |
| O2  | 0.4691 (5)  | -0.0721 (2) | 0.7423 (12)  | 0.0158 (9)                       |
| O3  | 0.7964 (4)  | 0.1716 (2)  | 0.8911 (11)  | 0.0133 (8)                       |
| O4  | 0.0824 (4)  | 0.1415 (2)  | 0.0646 (10)  | 0.0107 (8)                       |
| O5  | 0.9751 (4)  | 0.2658 (2)  | 0.2606 (9)   | 0.0102 (8)                       |
| O6  | 0.2153 (6)  | 0           | 0.6118 (15)  | 0.0139 (13)                      |
| B1  | 0.3853 (8)  | 0           | 0.7001 (18)  | 0.0064 (13)                      |
| B2  | 0.9529 (5)  | 0.1925 (3)  | 0.0710 (12)  | 0.0050 (6)*                      |

**Table S4.** Atomic displacement parameters ( $\text{\AA}^2$ ) for  $\text{Nd}(\text{Ca}_{0.8}\text{Sr}_{0.2})_4\text{O}(\text{BO}_3)_3$ .

|     | $U_{11}$    | $U_{22}$    | $U_{33}$    | $U_{12}$   | $U_{13}$    | $U_{23}$   |
|-----|-------------|-------------|-------------|------------|-------------|------------|
| Nd1 | 0.00655(16) | 0.01267(18) | 0.00420(15) | 0          | 0.00117(11) | 0          |
| Ca1 | 0.00655(16) | 0.01267(18) | 0.00420(15) | 0          | 0.00117(11) | 0          |
| Ca2 | 0.0075(3)   | 0.0084(4)   | 0.0069(3)   | -0.0010(3) | 0.0010(3)   | -0.0001(3) |

|     |            |            |            |             |            |             |
|-----|------------|------------|------------|-------------|------------|-------------|
| Sr2 | 0.0075(3)  | 0.0084(4)  | 0.0069(3)  | -0.0010(3)  | 0.0010(3)  | -0.0001(3)  |
| Nd3 | 0.0101(3)  | 0.0138(4)  | 0.0072(3)  | -0.0002(3)  | 0.0021(3)  | -0.0006(2)  |
| Ca3 | 0.0101(3)  | 0.0138(4)  | 0.0072(3)  | -0.0002(3)  | 0.0021(3)  | -0.0006(2)  |
| Sr3 | 0.0101(3)  | 0.0138(4)  | 0.0072(3)  | -0.0002(3)  | 0.0021(3)  | -0.0006(2)  |
| O1  | 0.009(2)   | 0.007(2)   | 0.009(2)   | 0           | 0.0028(19) | 0           |
| O2  | 0.0184(18) | 0.0094(17) | 0.0155(19) | 0.0060(15)  | 0.0031(15) | 0.0004(14)  |
| O3  | 0.0121(18) | 0.022(2)   | 0.0101(18) | -0.0078(15) | 0.0010(14) | -0.0029(14) |
| O4  | 0.0167(19) | 0.0127(19) | 0.017(2)   | 0.0027(15)  | 0.0053(15) | 0.0010(15)  |
| O5  | 0.0181(18) | 0.0112(17) | 0.0179(19) | -0.0030(14) | 0.0073(15) | -0.0040(14) |
| O6  | 0.006(2)   | 0.035(4)   | 0.008(3)   | 0           | 0.001(2)   | 0           |
| B1  | 0.009(3)   | 0.008(3)   | 0.005(3)   | 0           | 0.004(3)   | 0           |
| B2  | 0.009(2)   | 0.008(2)   | 0.007(2)   | -0.0025(19) | 0.0029(17) | 0.0022(18)  |

**Table S5.** Atomic displacement parameters ( $\text{\AA}^2$ ) for  $\text{Nd}(\text{Ca}_{0.5}\text{Sr}_{0.5})_4\text{O}(\text{BO}_3)_3$ .

|     | $U_{11}$  | $U_{22}$  | $U_{33}$  | $U_{12}$   | $U_{13}$  | $U_{23}$   |
|-----|-----------|-----------|-----------|------------|-----------|------------|
| Nd1 | 0.0079(3) | 0.0116(4) | 0.0068(3) | 0          | 0.0018(2) | 0          |
| Ca1 | 0.0079(3) | 0.0116(4) | 0.0068(3) | 0          | 0.0018(2) | 0          |
| Ca2 | 0.0079(6) | 0.0112(6) | 0.0099(5) | -0.0012(4) | 0.0012(4) | -0.0008(4) |
| Sr2 | 0.0079(6) | 0.0112(6) | 0.0099(5) | -0.0012(4) | 0.0012(4) | -0.0008(4) |
| Nd3 | 0.0113(5) | 0.0162(5) | 0.0105(5) | -0.0004(4) | 0.0027(4) | -0.0008(4) |
| Ca3 | 0.0113(5) | 0.0162(5) | 0.0105(5) | -0.0004(4) | 0.0027(4) | -0.0008(4) |
| Sr3 | 0.0113(5) | 0.0162(5) | 0.0105(5) | -0.0004(4) | 0.0027(4) | -0.0008(4) |
| O1  | 0.006(4)  | 0.014(5)  | 0.009(4)  | 0          | 0.004(3)  | 0          |
| O2  | 0.023(4)  | 0.013(3)  | 0.024(4)  | 0.010(3)   | 0.003(3)  | 0.000(3)   |
| O3  | 0.015(3)  | 0.027(4)  | 0.016(3)  | -0.010(3)  | 0.002(3)  | -0.002(3)  |
| O4  | 0.020(4)  | 0.017(3)  | 0.023(4)  | 0.006(3)   | 0.009(3)  | 0.004(3)   |
| O5  | 0.016(3)  | 0.011(3)  | 0.020(4)  | -0.007(2)  | 0.004(3)  | -0.005(2)  |
| O6  | 0.003(4)  | 0.039(7)  | 0.013(5)  | 0          | -0.004(4) | 0          |
| B2  | 0.006(4)  | 0.010(4)  | 0.012(4)  | -0.002(3)  | 0.002(3)  | 0.004(3)   |

**Table S6.** Atomic displacement parameters ( $\text{\AA}^2$ ) for  $\text{NdSr}_4\text{O}(\text{BO}_3)_3$ .

|     | U <sub>11</sub> | U <sub>22</sub> | U <sub>33</sub> | U <sub>12</sub> | U <sub>13</sub> | U <sub>23</sub> |
|-----|-----------------|-----------------|-----------------|-----------------|-----------------|-----------------|
| Nd1 | 0.00520(11)     | 0.00786(12)     | 0.00329(11)     | 0               | 0.00145(7)      | 0               |
| Sr2 | 0.01460(19)     | 0.01601(19)     | 0.01560(18)     | -0.00165(13)    | 0.00238(15)     | -0.00056(14)    |
| Sr3 | 0.01082(16)     | 0.01571(18)     | 0.00937(17)     | -0.00086(12)    | 0.00223(12)     | -0.00110(12)    |
| O1  | 0.0081(16)      | 0.0086(16)      | 0.0026(15)      | 0               | 0.0017(12)      | 0               |
| O2  | 0.0192(16)      | 0.0064(13)      | 0.0228(18)      | 0.0056(12)      | 0.0062(13)      | 0.0018(12)      |
| O3  | 0.0070(12)      | 0.0185(15)      | 0.0131(15)      | -0.0072(11)     | -0.0011(10)     | 0.0016(11)      |
| O4  | 0.0094(12)      | 0.0081(12)      | 0.0159(15)      | 0.0038(10)      | 0.0059(11)      | -0.0012(10)     |
| O5  | 0.0137(13)      | 0.0088(12)      | 0.0088(13)      | -0.0007(10)     | 0.0036(10)      | -0.0028(10)     |
| O6  | 0.0035(17)      | 0.027(3)        | 0.011(2)        | 0               | 0.0000(14)      | 0               |
| B1  | 0.009(2)        | 0.0048(19)      | 0.006(2)        | 0               | 0.0027(17)      | 0               |

**Table S7.** Bond lengths (Å) of (Ca<sub>1-x</sub>Sr<sub>x</sub>)<sub>4</sub>NdO(BO<sub>3</sub>)<sub>3</sub> (x = 0.2, 0.5, 1).

| x <sub>Sr</sub>       | 0.2      | 0.5       | 1        | x <sub>Sr</sub>      | 0.2        | 0.5        | 1         |
|-----------------------|----------|-----------|----------|----------------------|------------|------------|-----------|
| M1—O1 <sup>ii</sup>   | 2.285(6) | 2.318(10) | 2.308(5) | M3—O2 <sup>iv</sup>  | 2.390(4)   | 2.428(7)   | 2.468(4)  |
| M1—O1 <sup>i</sup>    | 2.292(5) | 2.307(8)  | 2.321(4) | M3—O5 <sup>ix</sup>  | 2.530(5)   | 2.576(7)   | 2.583(4)  |
| M1—O6 <sup>v</sup>    | 2.430(7) | 2.446(11) | 2.417(3) | M3—O3 <sup>ix</sup>  | 2.546(4)   | 2.580(7)   | 2.643(4)  |
| M1—O4                 | 2.447(4) | 2.431(7)  | 2.417(3) | M3—O5 <sup>xi</sup>  | 2.649(4)   | 2.711(6)   | 2.734(3)  |
| M1—O4 <sup>iv</sup>   | 2.447(4) | 2.431(7)  | 2.474(6) | M3—O5 <sup>ii</sup>  | 2.903(4)   | 2.901(6)   | 2.877(3)  |
| M1—O6                 | 2.520(6) | 2.553(9)  | 2.580(5) | M3—O6                | 2.9527(11) | 2.9826(16) | 3.0078(8) |
| <M1—O> <sub>6</sub>   | 2.404    | 2.414     | 2.420    | <M3—O> <sub>8</sub>  | 2.586      | 2.628      | 2.652     |
| M2—O1 <sup>vi</sup>   | 2.334(4) | 2.366(6)  | 2.398(3) | B1—O2                | 1.378(5)   | 1.380(10)  | 1.369(5)  |
| M2—O3 <sup>ix</sup>   | 2.369(4) | 2.404(7)  | 2.424(4) | B1—O6                | 1.373(10)  | 1.378(17)  | 1.369(5)  |
| M2—O5 <sup>ii</sup>   | 2.380(4) | 2.436(6)  | 2.433(5) | B1—O2 <sup>iv</sup>  | 1.378(5)   | 1.380(10)  | 1.387(8)  |
| M2—O2 <sup>vii</sup>  | 2.381(4) | 2.420(6)  | 2.440(4) | <B1—O> <sub>3</sub>  | 1.376      | 1.379      | 1.375     |
| M2—O2 <sup>vi</sup>   | 2.386(4) | 2.432(7)  | 2.443(4) | B2—O3 <sup>v</sup>   | 1.375(6)   | 1.358(11)  | 1.371(6)  |
| M2—O3 <sup>viii</sup> | 2.402(4) | 2.419(8)  | 2.452(3) | B2—O4 <sup>xii</sup> | 1.377(7)   | 1.385(12)  | 1.381(5)  |
| <M2—O> <sub>6</sub>   | 2.375    | 2.413     | 2.432    | B2—O5                | 1.382(7)   | 1.401(12)  | 1.390(5)  |
| M3—O4                 | 2.352(4) | 2.396(7)  | 2.445(3) | <B2—O> <sub>3</sub>  | 1.378      | 1.381      | 1.381     |
| M3—O4 <sup>x</sup>    | 2.368(5) | 2.446(8)  | 2.456(4) |                      |            |            |           |

Symmetry codes: (i)  $x-1, y, z-1$ ; (ii)  $x-1, y, z$ ; (iii)  $x, -y, z$ ; (iv)  $x, y, z-1$ ; (v)  $x-1/2, y+1/2, z$ ; (vi)  $x-1/2, y+1/2, z-1$ ; (vii)  $x-1/2, -y+1/2, z-1$ ; (viii)  $x-1/2, -y+1/2, z$ ; (ix)  $x, y, z+1$ ; (x)  $x-1/2, -y+1/2, z+1$ ; (xi)  $x+1, y, z$ .

**Table S8.** Crystal data and experimental details for structures of Nd(Ca<sub>0.8</sub>Sr<sub>0.2</sub>)<sub>4</sub>O(BO<sub>3</sub>)<sub>3</sub> in the temperature range 300 – 1273 K.

| Crystal data                                                               |                                                                                                                                                                                            |                    |                    |                    |                    |                    |
|----------------------------------------------------------------------------|--------------------------------------------------------------------------------------------------------------------------------------------------------------------------------------------|--------------------|--------------------|--------------------|--------------------|--------------------|
| $M_r$                                                                      | 535                                                                                                                                                                                        |                    |                    |                    |                    |                    |
| Crystal system, space group                                                | Monoclinic, $Cm$                                                                                                                                                                           |                    |                    |                    |                    |                    |
| Temperature (K)                                                            | 300                                                                                                                                                                                        | 473                | 673                | 873                | 1073               | 1273               |
| $a$ (Å)                                                                    | 8.1859 (2)                                                                                                                                                                                 | 8.1984 (3)         | 8.2196 (3)         | 8.2369 (3)         | 8.2548 (3)         | 8.2757 (3)         |
| $b$ (Å)                                                                    | 16.1737 (4)                                                                                                                                                                                | 16.1947 (6)        | 16.2230 (5)        | 16.2495 (6)        | 16.2784 (5)        | 16.3051 (6)        |
| $c$ (Å)                                                                    | 3.6245 (1)                                                                                                                                                                                 | 3.6342 (1)         | 3.6447 (1)         | 3.6539 (1)         | 3.6654 (1)         | 3.67710 (10)       |
| $\beta$ (°)                                                                | 101.480 (2)                                                                                                                                                                                | 101.469 (4)        | 101.515 (4)        | 101.545 (4)        | 101.601 (4)        | 101.636 (4)        |
| $V$ (Å³)                                                                   | 470.27 (2)                                                                                                                                                                                 | 472.88 (3)         | 476.23 (3)         | 479.16 (3)         | 482.48 (3)         | 485.98 (3)         |
| $Z$                                                                        | 2                                                                                                                                                                                          |                    |                    |                    |                    |                    |
| Radiation type                                                             | Mo $K\alpha$                                                                                                                                                                               |                    |                    |                    |                    |                    |
| $\mu$ (mm <sup>-1</sup> )                                                  | 11,79                                                                                                                                                                                      | 11,73              | 11,65              | 11,58              | 11,5               | 11,41              |
| Crystal size (mm)                                                          | 0.3×0.2×0.2                                                                                                                                                                                |                    |                    |                    |                    |                    |
| Data collection                                                            |                                                                                                                                                                                            |                    |                    |                    |                    |                    |
| Diffractometer                                                             | XtaLAB Synergy, Single source at home/near, HyPix                                                                                                                                          |                    |                    |                    |                    |                    |
| Absorption correction                                                      | <i>Multi-scan CrysAlis PRO</i> 1.171.41.104a (Rigaku Oxford Diffraction, 2021) Empirical absorption correction using spherical harmonics, implemented in SCALE3 ABSPACK scaling algorithm. |                    |                    |                    |                    |                    |
| $T_{\min}, T_{\max}$                                                       | 0.463, 1                                                                                                                                                                                   | 0.386, 1           | 0.464, 1           | 0.422, 1           | 0.419, 1           | 0.492, 1           |
| No. of measured, independent and observed [ $I > 3\sigma(I)$ ] reflections | 5321, 982, 980                                                                                                                                                                             | 2511, 847, 837     | 2431, 894, 884     | 2805, 903, 891     | 2907, 950, 936     | 2753, 945, 931     |
| $R_{\text{int}}$                                                           | 0,053                                                                                                                                                                                      | 0,023              | 0,019              | 0,024              | 0,024              | 0,023              |
| $(\sin \theta/\lambda)_{\max}$ (Å <sup>-1</sup> )                          | 0,678                                                                                                                                                                                      | 0,696              | 0,687              | 0,721              | 0,723              | 0,724              |
| Refinement                                                                 |                                                                                                                                                                                            |                    |                    |                    |                    |                    |
| $R[F^2 > 2\sigma(F^2)], wR(F^2), S$                                        | 0.038, 0.046, 3.54                                                                                                                                                                         | 0.018, 0.023, 1.44 | 0.017, 0.022, 1.35 | 0.019, 0.024, 1.48 | 0.019, 0.024, 1.43 | 0.020, 0.024, 1.41 |
| No. of reflections                                                         | 982                                                                                                                                                                                        | 847                | 894                | 903                | 950                | 945                |
| No. of parameters                                                          | 82                                                                                                                                                                                         | 82                 | 82                 | 82                 | 82                 | 82                 |

|                                                                          |     |     |     |     |     |     |
|--------------------------------------------------------------------------|-----|-----|-----|-----|-----|-----|
| <sup>2</sup> Absolute structure, Friedel pairs<br>used in the refinement | 427 | 283 | 327 | 327 | 373 | 365 |
|--------------------------------------------------------------------------|-----|-----|-----|-----|-----|-----|



**Table S9.** Change in bond lengths (Å) of Nd(Ca<sub>0.8</sub>Sr<sub>0.2</sub>)<sub>4</sub>O(BO<sub>3</sub>)<sub>3</sub> in the temperature range 273-1273 K.

| T, K                  | 300         | 473         | 673         | 873         | 1073        | 1273        |
|-----------------------|-------------|-------------|-------------|-------------|-------------|-------------|
| M1—O1 <sup>ii</sup>   | 2.269 (11)  | 2.270 (7)   | 2.270 (7)   | 2.279 (7)   | 2.280 (7)   | 2.283 (7)   |
| M1—O1 <sup>i</sup>    | 2.291 (9)   | 2.303 (6)   | 2.302 (6)   | 2.307 (6)   | 2.310 (6)   | 2.314 (6)   |
| M1—O6 <sup>v</sup>    | 2.438 (11)  | 2.445 (7)   | 2.448 (7)   | 2.451 (8)   | 2.464 (8)   | 2.468 (8)   |
| M1—O4                 | 2.440 (7)   | 2.450 (4)   | 2.458 (4)   | 2.461 (4)   | 2.462 (4)   | 2.467 (5)   |
| M1—O4 <sup>iv</sup>   | 2.440 (7)   | 2.450 (4)   | 2.458 (4)   | 2.461 (4)   | 2.462 (4)   | 2.467 (5)   |
| M1—O6                 | 2.515 (9)   | 2.531 (6)   | 2.542 (6)   | 2.547 (6)   | 2.570 (7)   | 2.587 (7)   |
| <M1-O> <sub>6</sub>   | 2.399       | 2.408       | 2.413       | 2.418       | 2.425       | 2.431       |
| M2—O1 <sup>vi</sup>   | 2.342 (6)   | 2.340 (4)   | 2.351 (4)   | 2.352 (4)   | 2.358 (4)   | 2.366 (4)   |
| M2—O3 <sup>ix</sup>   | 2.363 (7)   | 2.372 (4)   | 2.380 (4)   | 2.386 (4)   | 2.384 (4)   | 2.397 (4)   |
| M2—O5 <sup>ii</sup>   | 2.372 (7)   | 2.384 (4)   | 2.383 (4)   | 2.397 (4)   | 2.404 (4)   | 2.409 (5)   |
| M2—O2 <sup>vi</sup>   | 2.392 (8)   | 2.386 (5)   | 2.398 (5)   | 2.405 (5)   | 2.410 (5)   | 2.416 (5)   |
| M2—O2 <sup>vii</sup>  | 2.367 (6)   | 2.392 (4)   | 2.407 (4)   | 2.408 (4)   | 2.413 (4)   | 2.434 (5)   |
| M2—O3 <sup>viii</sup> | 2.409 (8)   | 2.398 (5)   | 2.412 (5)   | 2.411 (5)   | 2.416 (5)   | 2.430 (5)   |
| <M2-O> <sub>6</sub>   | 2.374       | 2.379       | 2.389       | 2.393       | 2.398       | 2.409       |
| M3—O4                 | 2.357 (7)   | 2.356 (4)   | 2.355 (4)   | 2.361 (4)   | 2.362 (4)   | 2.369 (5)   |
| M3—O4 <sup>x</sup>    | 2.370 (8)   | 2.366 (5)   | 2.377 (5)   | 2.381 (5)   | 2.394 (5)   | 2.396 (5)   |
| M3—O2 <sup>iv</sup>   | 2.393 (7)   | 2.400 (4)   | 2.399 (4)   | 2.409 (4)   | 2.422 (4)   | 2.420 (5)   |
| M3—O5 <sup>ix</sup>   | 2.529 (8)   | 2.534 (5)   | 2.553 (5)   | 2.562 (5)   | 2.579 (5)   | 2.586 (6)   |
| M3—O3 <sup>ix</sup>   | 2.547 (7)   | 2.567 (4)   | 2.568 (4)   | 2.584 (5)   | 2.599 (4)   | 2.601 (5)   |
| M3—O5 <sup>xi</sup>   | 2.651 (6)   | 2.665 (4)   | 2.671 (4)   | 2.674 (4)   | 2.679 (4)   | 2.682 (5)   |
| M3—O5 <sup>ii</sup>   | 2.898 (7)   | 2.899 (4)   | 2.905 (4)   | 2.915 (4)   | 2.920 (4)   | 2.934 (5)   |
| M3—O6                 | 2.9521 (18) | 2.9508 (12) | 2.9509 (12) | 2.9517 (13) | 2.9507 (12) | 2.9497 (13) |
| <M3-O> <sub>8</sub>   | 2.587       | 2.592       | 2.597       | 2.605       | 2.613       | 2.617       |
| B1—O2                 | 1.384 (10)  | 1.373 (6)   | 1.372 (6)   | 1.370 (6)   | 1.371 (6)   | 1.369 (6)   |
| B1—O2 <sup>iv</sup>   | 1.384 (10)  | 1.373 (6)   | 1.372 (6)   | 1.370 (6)   | 1.371 (6)   | 1.369 (6)   |
| B1—O6                 | 1.365 (18)  | 1.373 (11)  | 1.373 (10)  | 1.388 (10)  | 1.378 (10)  | 1.375 (11)  |
| <B1-O> <sub>3</sub>   | 1.378       | 1.373       | 1.372       | 1.376       | 1.373       | 1.371       |
| B2—O3 <sup>v</sup>    | 1.372 (11)  | 1.363 (7)   | 1.354 (7)   | 1.364 (7)   | 1.367 (7)   | 1.357 (7)   |
| B2—O5                 | 1.393 (12)  | 1.382 (8)   | 1.384 (7)   | 1.381 (7)   | 1.379 (7)   | 1.380 (8)   |
| B2—O4 <sup>xii</sup>  | 1.374 (12)  | 1.397 (8)   | 1.399 (8)   | 1.387 (8)   | 1.390 (8)   | 1.398 (8)   |
| <B2-O> <sub>3</sub>   | 1.380       | 1.381       | 1.379       | 1.377       | 1.379       | 1.378       |

**Table S10.** Coefficients of approximation of temperature dependencies by polynomial function ( $p_T = p_0 + p_1T + p_2T^2$ ) of (Ca<sub>1-x</sub>Sr<sub>x</sub>)<sub>4</sub>NdO(BO<sub>3</sub>)<sub>3</sub> ( $x = 0, 0.2, 0.5$ ) solid solutions.

|                                                                             | $p_0$         | $p_1 \times 10^3$ | $p_2 \times 10^6$ |
|-----------------------------------------------------------------------------|---------------|-------------------|-------------------|
| $\text{Ca}_4\text{NdO}(\text{BO}_3)_3$ ( $x = 0$ )                          |               |                   |                   |
| $a$                                                                         | 8.125426(57)  | 0.07513(31)       | 0.01476(36)       |
| $b$                                                                         | 16.04469(21)  | 0.1070(11)        | 0.0352(13)        |
| $c$                                                                         | 3.590466(24)  | 0.04180(13)       | 0.00967(15)       |
| $\beta$                                                                     | 101.36470(54) | 0.0798(30)        | 0.101(35)         |
| $V$                                                                         | 458.9131(78)  | 12.492(43)        | 3.093(51)         |
| $(\text{Ca}_{1.8}\text{Sr}_{0.2})_4\text{NdO}(\text{BO}_3)_3$ ( $x = 0.2$ ) |               |                   |                   |
| $a$                                                                         | 8.16505(26)   | 0.0000851(15)     | 0.0018(17)        |
| $b$                                                                         | 16.14137(65)  | 0.0001051(36)     | 0.0293(43)        |
| $c$                                                                         | 3.614363(83)  | 0.00004589(46)    | 0.00588(54)       |
| $\beta$                                                                     | 101.4574(12)  | 0.0000881(69)     | 0.1158(83)        |
| $V$                                                                         | 467.18(32)    | 12.0(19)          | 3.2(23)           |
| $(\text{Ca}_{0.5}\text{Sr}_{0.5})_4\text{NdO}(\text{BO}_3)_3$ ( $x = 0.2$ ) |               |                   |                   |
| $a$                                                                         | 8.27112(49)   | 0.0861(27)        | 0.0048(31)        |
| $b$                                                                         | 16.33471(70)  | 0.1132(38)        | 0.0091(45)        |
| $c$                                                                         | 3.67570(25)   | 0.0453(13)        | 0.0071(15)        |
| $\beta$                                                                     | 101.6636(33)  | 0.093(18)         | 0.075(21)         |
| $V$                                                                         | 486.351(70)   | 14.29(39)         | 0.91(45)          |
